# Supplementary material
Source: Springer Nature journal article supplement (https://www.springermedizin.de/resource/supplementary/12872_2012_483_MOESM2_ESM.pdf/9430132)

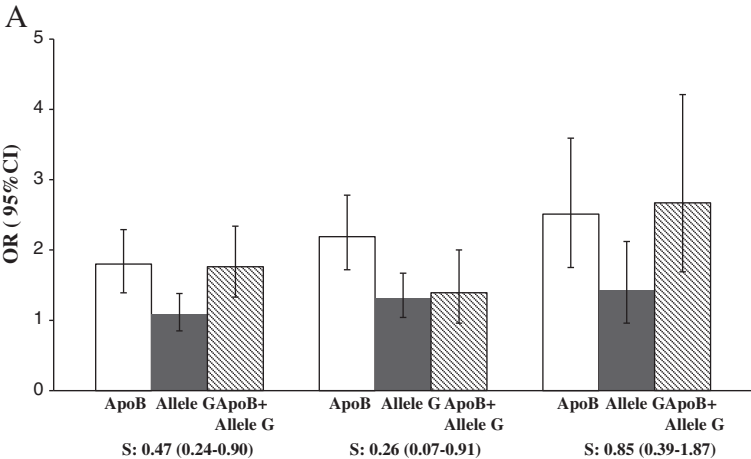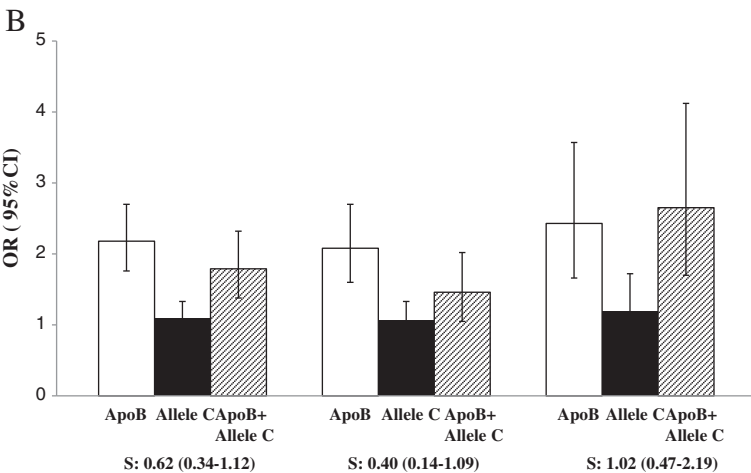

Supplement: MOESM2 [file 9430132]
